# Supplementary material for: Isomeric porphyrin phenanthrenequinones: synthesis, NMR spectroscopy, electrochemical properties, and in situ EPR/ENDOR studies of the o-semiquinone anion radicalsElectronic supplementary information (ESI) available: 1H and 13C NMR data for various phenanthrene derivatives. See http://www.rsc.org./suppdata/p2/b1/b110273g/
Source: Royal Society of Chemistry journal article supplement (doi:10.1039/b110273g), 2002-02-01
Supplement: b110273g.pdf [file b110273g.pdf]

**Table S1** Proton chemical shifts of the phenanthrene fragment in some derivatives [ppm]

| compound  | H1   | H2   | H3   | H4   | H7   | H8   | H9   | H10  | H15  | H16  | H17   |
|-----------|------|------|------|------|------|------|------|------|------|------|-------|
| <b>12</b> | 8.11 | 7.43 | 7.68 | 7.94 | 7.94 | 7.68 | 7.43 | 8.11 | ---  | ---  | ---   |
| <b>14</b> | 8.30 | 7.66 | 7.64 | 8.66 | 8.66 | 7.64 | 7.66 | 8.30 | 4.11 | 4.11 | ---   |
| <b>16</b> | 8.29 | 7.71 | 7.69 | 8.73 | 9.12 | ---  | 8.10 | 8.35 | 4.15 | 4.09 | 10.25 |
| <b>7</b>  | 8.43 | 7.72 | 7.58 | 8.74 | 9.57 | ---  | 8.59 | 8.68 | 4.39 | 4.31 | ---   |
| <b>8</b>  | 8.21 | 7.54 | 7.39 | 8.57 | 9.45 | ---  | 8.50 | 8.46 | 4.17 | 4.11 | ---   |
| <b>5</b>  | 8.25 | 7.46 | 7.59 | 8.01 | 8.88 | ---  | 8.34 | 8.59 | ---  | ---  | ---   |
| <b>6</b>  | 8.24 | 7.44 | 7.55 | 7.99 | 8.87 | ---  | 8.34 | 8.57 | ---  | ---  | ---   |
| <b>15</b> | 8.24 | 7.64 | 7.61 | 8.56 | 8.72 | 7.58 | 7.88 | ---  | 3.93 | 4.10 | 10.99 |
| <b>3</b>  | 8.24 | 7.73 | 7.76 | 8.99 | 9.15 | 7.88 | 8.26 | ---  | 1.87 | 3.54 | ---   |
| <b>4</b>  | 8.12 | 7.64 | 7.68 | 8.91 | 9.08 | 7.82 | 8.24 | ---  | 1.72 | 3.42 | ---   |
| <b>1</b>  | 8.03 | 7.38 | 7.65 | 8.12 | 8.31 | 7.82 | 8.10 | ---  | ---  | ---  | ---   |
| <b>2</b>  | 8.03 | 7.38 | 7.78 | 8.28 | 8.47 | 8.00 | 8.23 | ---  | ---  | ---  | ---   |

**Table S2**  $^{13}\text{C}$  NMR chemical shifts for various phenanthrene derivatives [ppm]

| compound  | C1     | C2     | C3     | C4     | C5     | C6     | C7     | C8     | C9     | C10    | C11    | C12    | C13    | C14    | C15   | C16   |
|-----------|--------|--------|--------|--------|--------|--------|--------|--------|--------|--------|--------|--------|--------|--------|-------|-------|
| <b>12</b> | 130.34 | 129.48 | 136.00 | 123.87 | 135.64 | 135.64 | 123.87 | 136.00 | 129.48 | 130.34 | 130.76 | 180.10 | 180.10 | 130.76 | ---   | ---   |
| <b>14</b> | 122.09 | 126.78 | 125.77 | 122.59 | 128.61 | 128.61 | 122.59 | 125.77 | 126.78 | 122.09 | 129.05 | 143.88 | 143.88 | 129.05 | 60.93 | 60.93 |
| <b>16</b> | 122.36 | 127.38 | 126.53 | 122.47 | 128.63 | 127.91 | 126.74 | 133.17 | 125.17 | 122.76 | 133.26 | 143.12 | 146.64 | 129.15 | 60.83 | 60.83 |
| <b>7</b>  | 122.30 | 127.15 | 126.06 | 122.95 | 128.77 | 127.15 | 128.96 | 139.68 | 133.40 | 120.27 | 128.48 | 144.10 | 144.51 | 129.78 | 61.26 | 61.14 |
| <b>8</b>  | 122.17 | 126.97 | 125.85 | 122.84 | 128.71 | 126.97 | 128.71 | 140.30 | 133.28 | 120.02 | 128.21 | 143.96 | 144.23 | 129.62 | 61.15 | 61.04 |
| <b>5</b>  | 130.69 | 129.80 | 136.04 | 124.26 | 135.83 | 134.06 | 130.25 | 150.46 | 135.45 | 128.89 | 130.06 | 180.54 | 180.36 | 131.56 | ---   | ---   |
| <b>6</b>  | 130.39 | 129.48 | 135.94 | 124.14 | 135.75 | 133.61 | 130.18 | 151.76 | 135.61 | 128.39 | 129.65 | 180.50 | 180.37 | 131.48 | ---   | ---   |
| <b>15</b> | 122.10 | 127.38 | 126.45 | 122.80 | 128.43 | 129.11 | 126.80 | 125.29 | 127.46 | 135.07 | 127.58 | 144.39 | 146.31 | 128.84 | 60.27 | 61.05 |
| <b>3</b>  | 121.88 | 127.15 | 126.14 | 123.41 | 128.51 | 128.86 | 123.21 | 123.18 | 135.33 | 137.35 | 131.21 | 146.04 | 146.04 | 129.54 | 59.00 | 60.27 |
| <b>4</b>  | 121.80 | 127.06 | 126.06 | 123.37 | 128.54 | 128.82 | 123.01 | 123.10 | 135.17 | 137.99 | 131.17 | 146.19 | 145.96 | 129.43 | 59.04 | 60.30 |
| <b>1</b>  | 130.07 | 129.63 | 136.04 | 124.88 | 136.25 | 136.46 | 124.88 | 132.75 | 136.79 | 146.04 | 131.96 | 180.74 | 180.64 | 131.19 | ---   | ---   |
| <b>2</b>  | 130.11 | 129.65 | 136.09 | 124.91 | 136.42 | ---    | 124.81 | 132.83 | 136.47 | 146.94 | 132.03 | 180.85 | 180.67 | 131.18 | ---   | ---   |
